# Supplementary material for: Non-invasive and rapid diagnosis of low-grade bladder cancer via SERSomes of urine
Source: Royal Society of Chemistry journal article supplement (doi:10.1039/d4nr05306k), 2025-01-01
Supplement: d4nr05306k1.pdf [file d4nr05306k1.pdf]

*Supporting Information*

**Non-Invasive and Rapid Diagnosis of Low-Grade Bladder  
Cancer via SERSomes of Urine**

*Yao Lu,<sup>1,Δ</sup> Jiayi Wang,<sup>2,Δ</sup> Xinyuan Bi,<sup>1</sup> Hongyang Qian,<sup>2</sup> Jiahua Pan,<sup>2,\*</sup> Jian Ye<sup>1,3,4,5\*</sup>*

<sup>1</sup>State Key Laboratory of Systems Medicine for Cancer, School of Biomedical Engineering, Shanghai Jiao Tong University, Shanghai, P.R. China

<sup>2</sup>Department of Urology, Ren Ji Hospital, School of Medicine, Shanghai Jiao Tong University, Shanghai, P.R. China

<sup>3</sup>Institute of Medical Robotics, Shanghai Jiao Tong University, Shanghai 200240, P. R. China

<sup>4</sup>Shanghai Key Laboratory of Gynecologic Oncology, Ren Ji Hospital, School of Medicine, Shanghai Jiao Tong University, Shanghai 200127, P. R. China

\*To whom correspondence should be addressed. [yejian78@sjtu.edu.cn](mailto:yejian78@sjtu.edu.cn) (J.Y.),  
[panjiahua@renji.com](mailto:panjiahua@renji.com) (J.P.)

<sup>Δ</sup>These authors contributed equally.

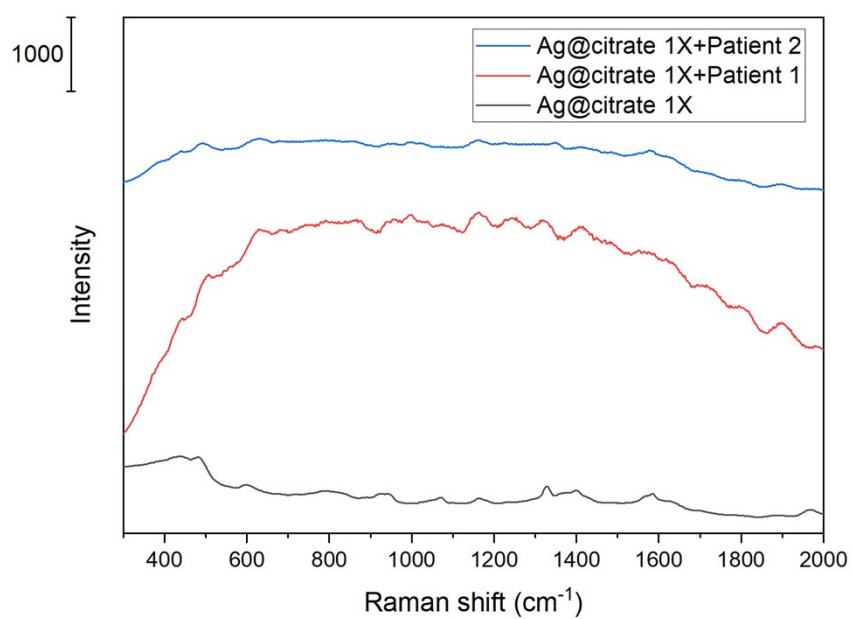

**Figure S1.** SERS average spectra for 2 different patients using the original Ag NPs as substrates.

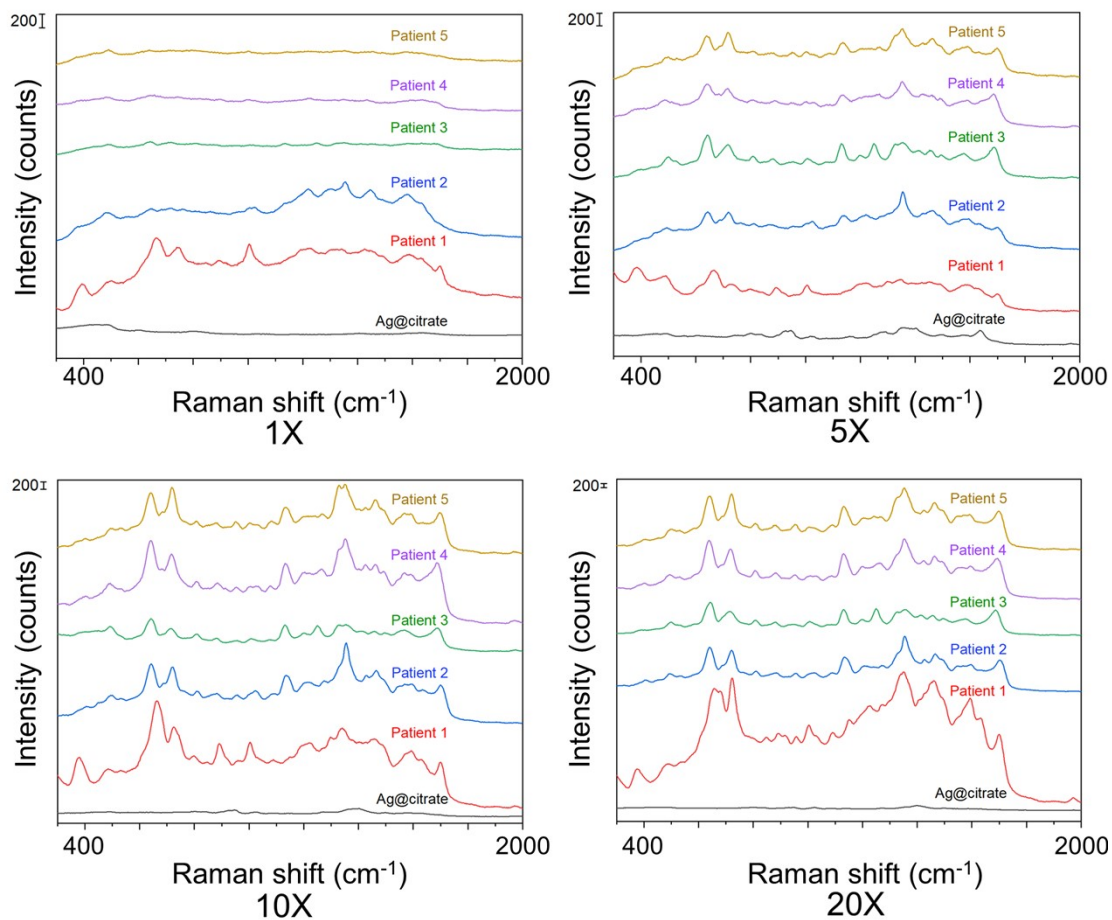

**Figure S2.** SERS average spectra for 5 different patients using original, 5X, 10X and 20X concentrated Ag NPs as substrates.

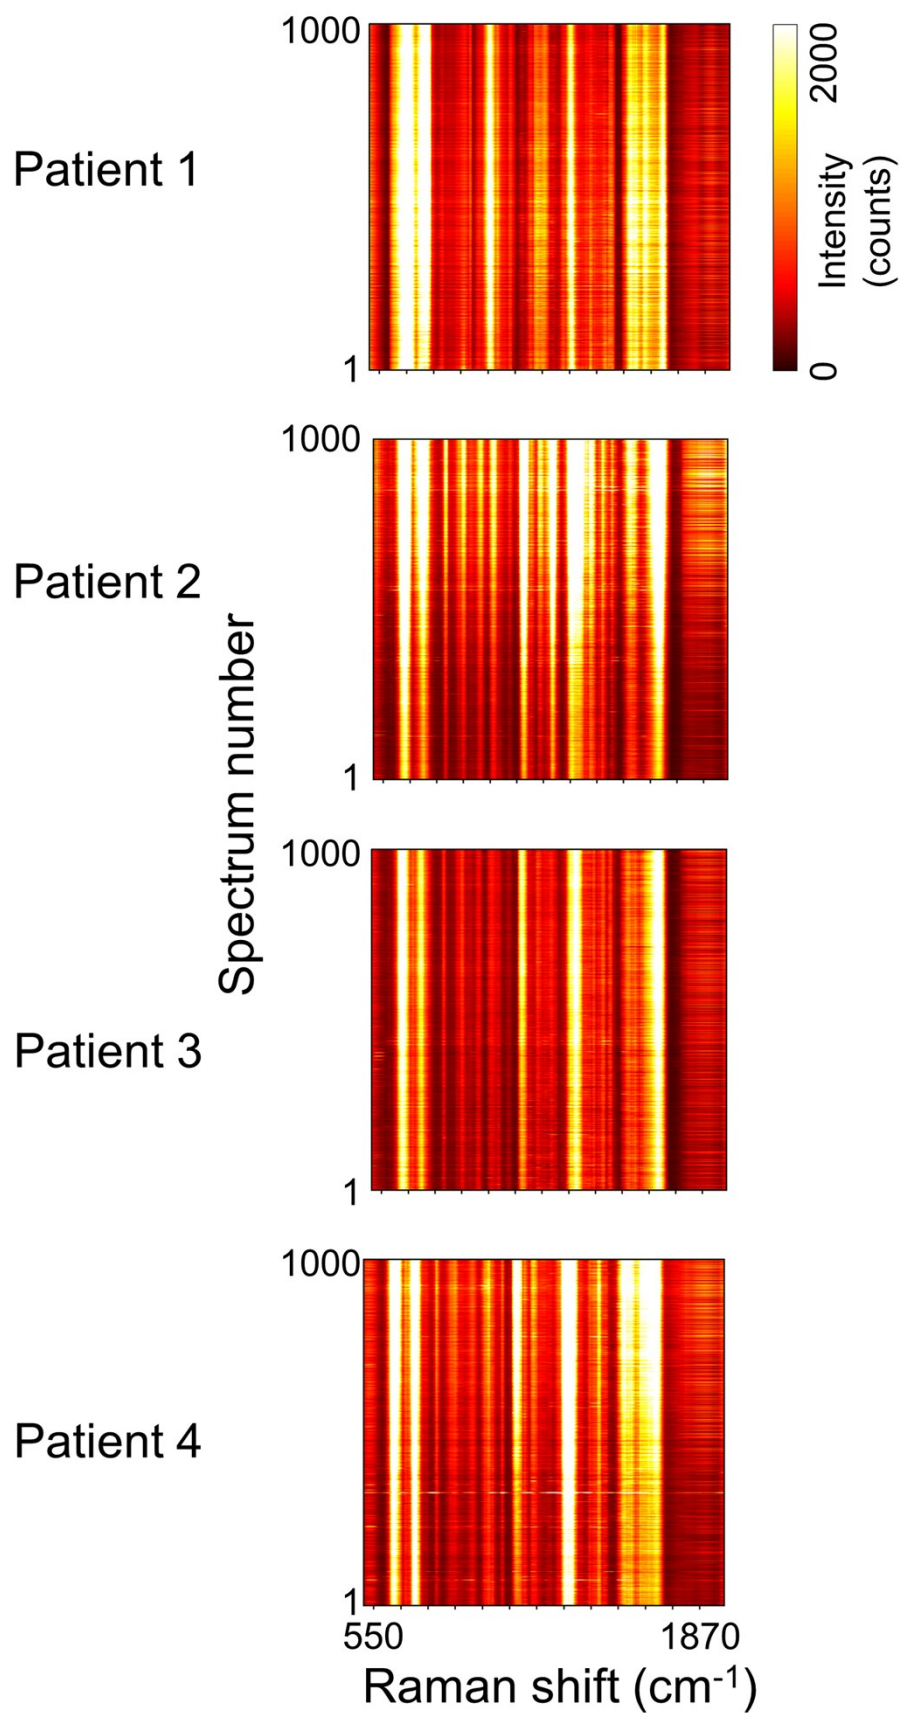

**Figure S3.** SERS spectra heatmaps of 4 different patients' urine samples with concentrated Ag NPs (~ 0.076 mg/mL).

**Table S1.** The possible corresponding relationships between the important differential bands and biological substances in urine sample. (For the substances without references marked, they can be referred to the database shown in Figure 4B&C.)

| Peak (cm <sup>-1</sup> )   | Substance                                                               |
|----------------------------|-------------------------------------------------------------------------|
| <b>LGBC diagnosis</b>      |                                                                         |
| 749-767                    | Tryptophan <sup>1</sup> /ethanolamine <sup>1</sup>                      |
| 1389-1405                  | NH in-plane deformation <sup>2</sup>                                    |
| 593-608                    | Phosphate <sup>3</sup> /cholesterol <sup>4</sup>                        |
| 662-682                    | Ring breathing modes in the DNA bases <sup>5</sup>                      |
| 1311-1361                  | Ring breathing modes in the DNA/RNA bases <sup>5</sup>                  |
| 1706-1726                  | Xanthine/urea                                                           |
| 707-727                    | DNA <sup>6</sup>                                                        |
| 1147-1187                  | Palmitic acid <sup>4</sup>                                              |
| 1425-1465                  | Saturated fatty acid chains <sup>4</sup>                                |
| 1273-1309                  | Palmitic acid <sup>4</sup>                                              |
| <b>LGBC stratification</b> |                                                                         |
| 1440-1461                  | Hypoxanthine                                                            |
| 1387-1411                  | NH in-plane deformation <sup>2</sup>                                    |
| 736-760                    | Hypoxanthine/riboflavin                                                 |
| 702-723                    | Cholesterol <sup>4</sup>                                                |
| 1701-1724                  | Xanthine/urea                                                           |
| 1482-1520                  | Hypoxanthine/riboflavin                                                 |
| 1140-1147                  | Phenylalanine                                                           |
| 1319-1355                  | Guanine <sup>7</sup> /tryptophan <sup>3</sup>                           |
| 1541-1567                  | Porphyrin <sup>8</sup> /NADH <sup>9</sup>                               |
| 1609-1627                  | Phenylalanine <sup>10</sup> /NADH <sup>9</sup> /tryptophan <sup>3</sup> |

## References

1. V. Zivanovic, A. Milewska, K. Leosson and J. Kneipp, *Anal Chem*, 2021, **93**, 10106-10113.
2. S. Farquharson, C. Shende, F. E. Inscore, P. Maksymiuk and A. Gift, *J Raman Spectrosc*, 2005, **36**, 208-212.
3. W. T. Cheng, M. T. Liu, H. N. Liu and S. Y. Lin, *Microsc Res Techniq*, 2005, **68**, 75-79.
4. C. Krafft, L. Neudert, T. Simat and R. Salzer, *Spectrochimica Acta Part A: Molecular and Biomolecular Spectroscopy*, 2005, **61**, 1529-1535.
5. J. W. Chan, D. S. Taylor, T. Zwerdling, S. M. Lane, K. Ihara and T. Huser, *Biophys J*, 2006, **90**, 648-656.
6. G. Shetty, C. Kendall, N. Shepherd, N. Stone and H. Barr, *Brit J Cancer*, 2006, **94**, 1460-1464.
7. A. J. Ruiz-Chica, M. A. Medina, F. Sánchez-Jiménez and F. J. Ramírez, *J Raman Spectrosc*,

2004, **35**, 93-100.

8. Z. W. Huang, A. McWilliams, H. Lui, D. I. McLean, S. Lam and H. S. Zeng, *Int J Cancer*, 2003, **107**, 1047-1052.
9. R. Malini, K. Venkatakrisna, J. Kurien, K. M. Pai, L. Rao, V. B. Kartha and C. M. Krishna, *Biopolymers*, 2006, **81**, 179-193.
10. I. Notingher, C. Green, C. Dyer, E. Perkins, N. Hopkins, C. Lindsay and L. L. Hench, *J R Soc Interface*, 2004, **1**, 79-90.
